# Supplementary figures and images for: Impact of COVID-19 Mitigation Measures on Mosquito-Borne Diseases in 2020 in Queensland, Australia
Source: MDPI journal article supplement (doi:10.3390/v13061150), 2021-06-16

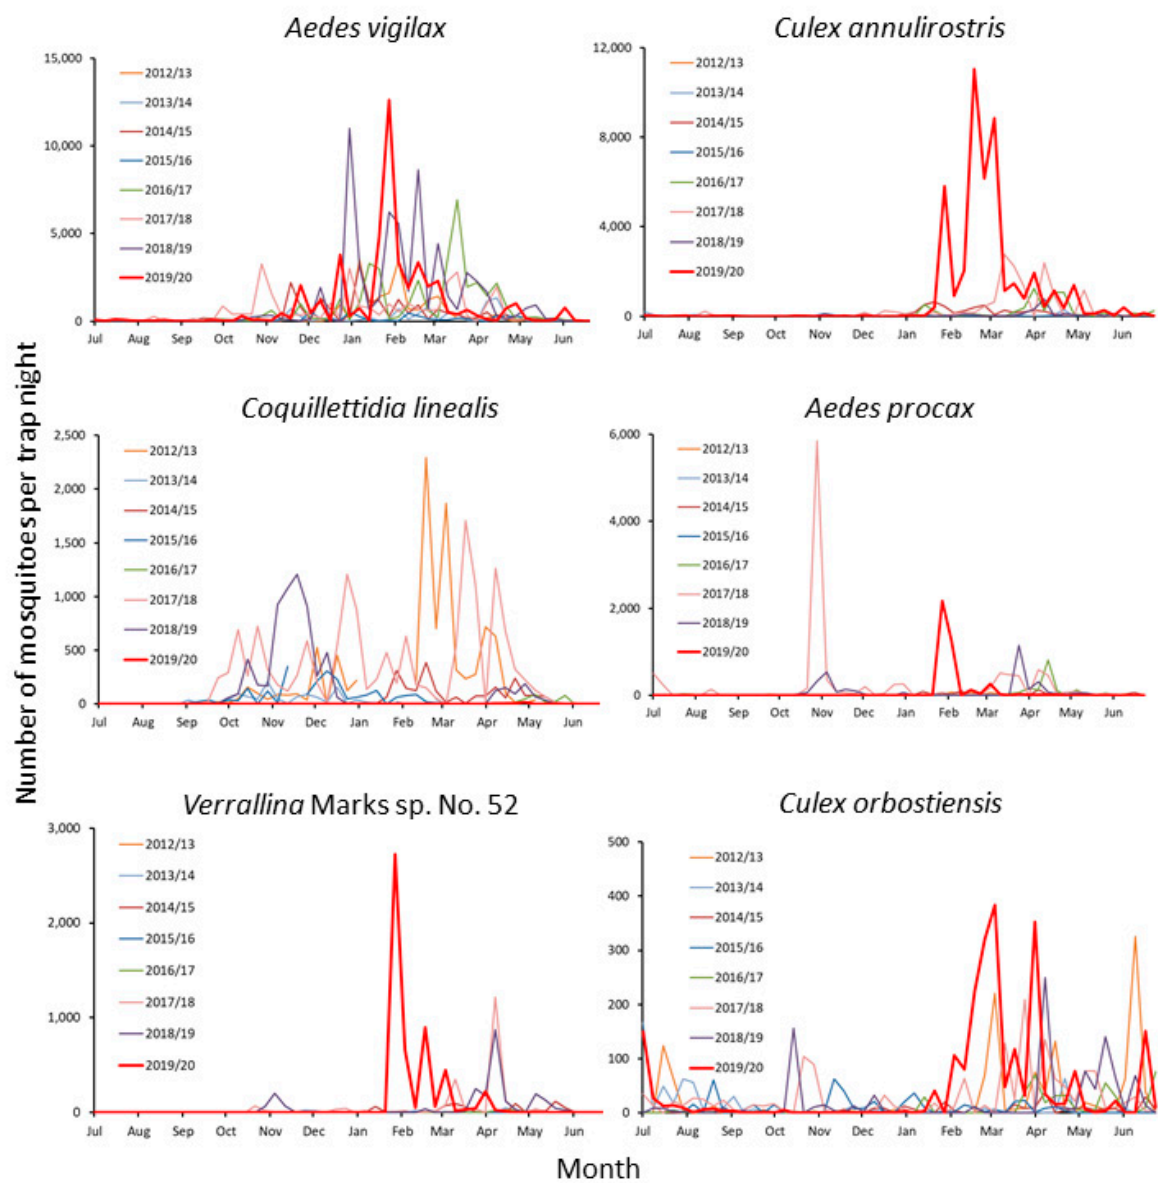

Supplement: s1 [file s1]
